# Supplementary material for: Selectivity-controllable hydrogen transfer reduction of α,β-unsaturated aldehydes over high-entropy catalysts
Source: Royal Society of Chemistry journal article supplement (doi:10.1039/d3cy01664a), 2024-01-01
Supplement: d3cy01664a1.pdf [file d3cy01664a1.pdf]

# Selectivity-Controllable Hydrogen Transfer Reduction of $\alpha$ , $\beta$ -Unsaturated Aldehydes Over the High-Entropy Catalysts

Ziling Liu, Jipeng Wang, Xiaoqian Gao, Yadong Bi\*, Chen Guo and Xinli Tong\*

Tianjin Key Laboratory of Organic Solar Cells and Photochemical Conversion, School of Chemistry and Chemical Engineering, Tianjin University of Technology, Tianjin 300384, P. R. China; Tel: +86-22-60214259; E-mail: tongxinli@tju.edu.cn, tongxli@sohu.com (X. T.) or ease\_cloud801@sina.com (Y. B.).

## Supporting Information

### 1. The characterization of catalysts

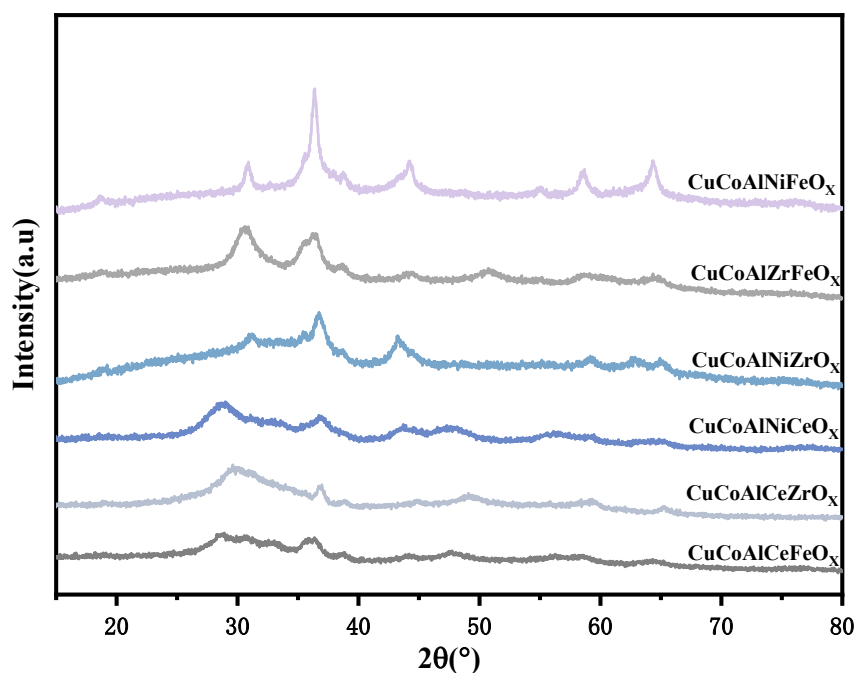

Figure S1. XRD patterns of the different solid catalysts

Table S1. The BET surface area and pore size of different catalysts

| Catalyst                 | BET Surface area (m <sup>2</sup> •g <sup>-1</sup> )<br>1) | Pore volume (cm <sup>3</sup> •g <sup>-1</sup> ) | Average pore diameter(Å) |
|--------------------------|-----------------------------------------------------------|-------------------------------------------------|--------------------------|
| CuCoAlNiFeO <sub>x</sub> | 66.78                                                     | 0.1217                                          | 42.21                    |
| CuCoAlNiFe-250R          | 46.43                                                     | 0.1005                                          | 44.22                    |
| CuCoAlNiFe-350R          | 47.95                                                     | 0.1071                                          | 45.91                    |
| CuCoAlNiFe-450R          | 57.56                                                     | 0.1211                                          | 49.56                    |
| CuCoAlNiFe-550R          | 37.43                                                     | 0.09303                                         | 51.82                    |

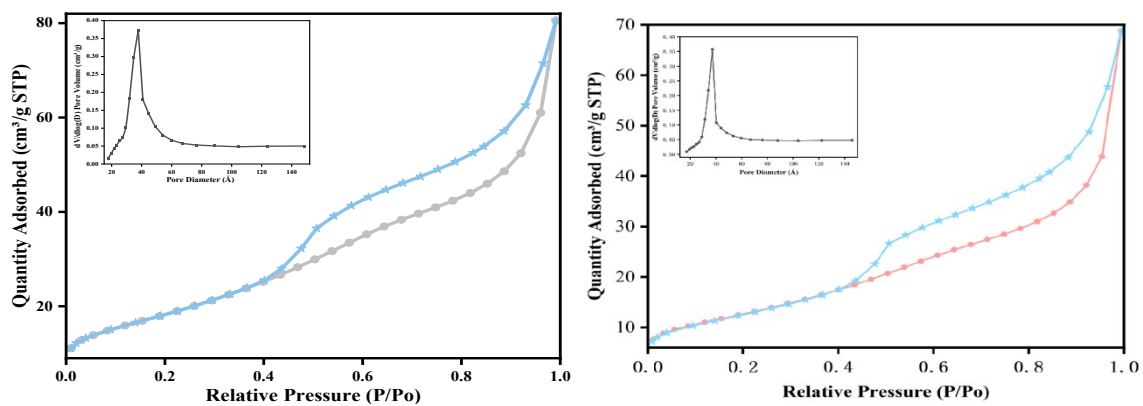

**Figure S2.** The N<sub>2</sub> adsorption-desorption isotherm and pore size distribution of CuCoAlNiFeO<sub>x</sub> (left) and CuCoAlNiFe-250R (right)

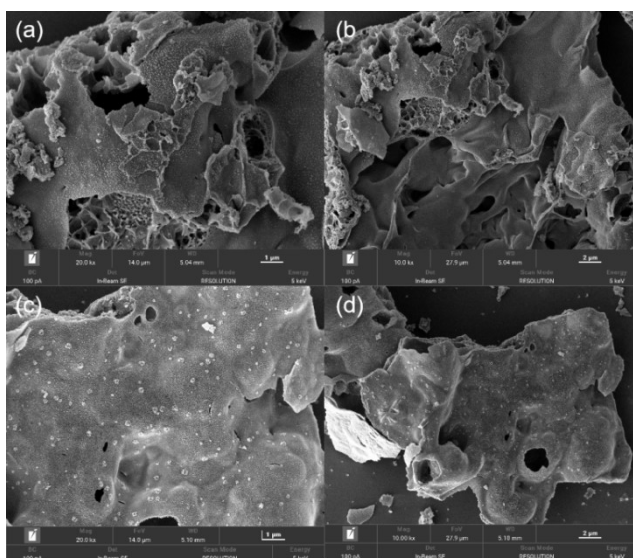

**Figure S3.** The SEM images of the CuCoAlNiFeO<sub>x</sub> catalyst (a, b) and CuCoAlNiFe-250R catalyst (c, d)

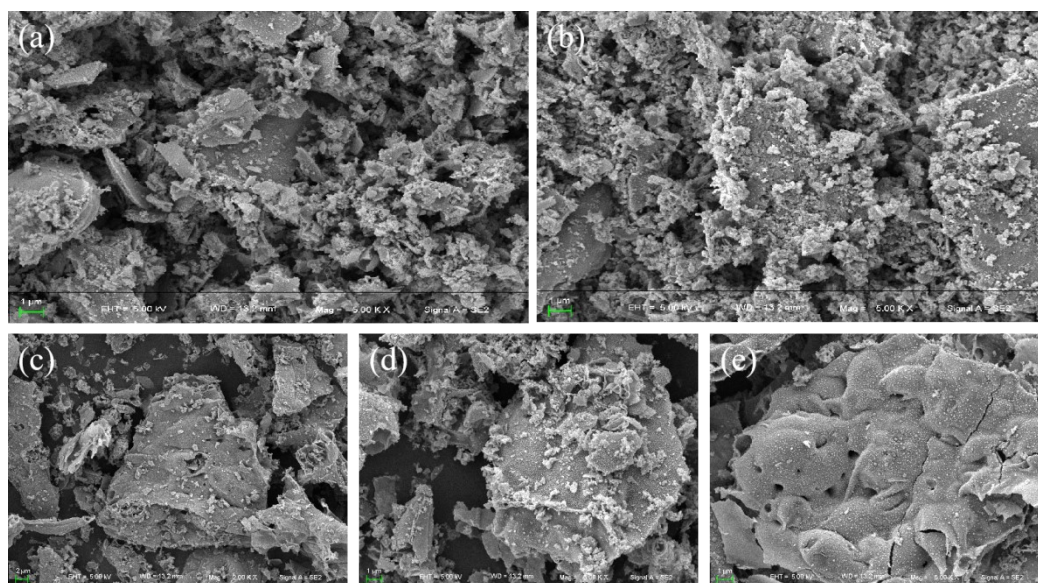

**Figure S4.** The SEM images of CuCoAlNiFe-250R (a), CuCoAlNiFe-350R (b), CuCoAlNiFe-450R (c), CuCoAlNiFe-550R (d), and CuCoAlNiFe-650R (e)

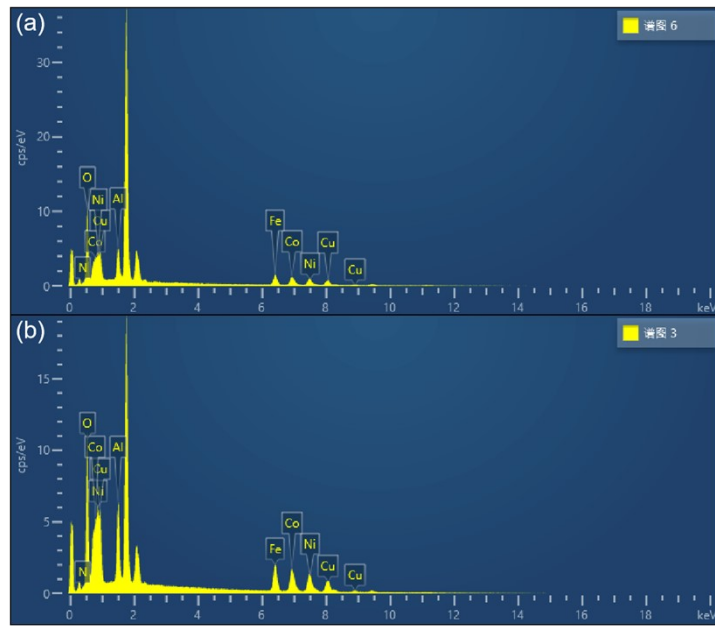

**Figure S5.** EDX results of CuCoAlNiFeO<sub>x</sub> catalyst (a) and the CuCoAlNiFe-250R catalyst (b)

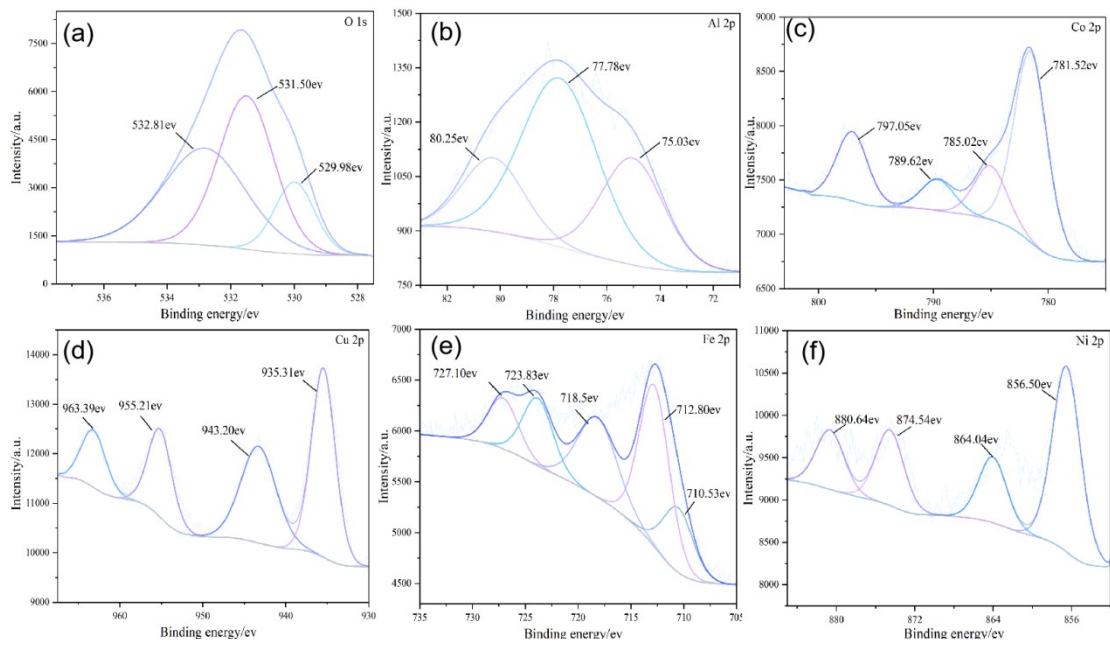

**Figure S6.** The XPS spectra of the O, Al, Co, Cu, Fe or Ni element in CuCoAlNiFeO<sub>x</sub> catalyst

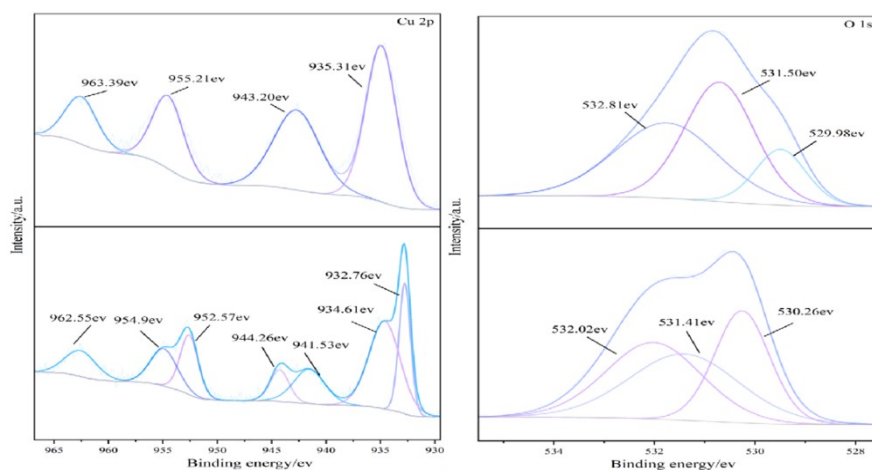

**Figure S7.** The XPS spectra of O 1s and Cu 2p of CuCoAlNiFeO<sub>x</sub> catalyst and the CuCoAlNiFe-250R catalyst

### 3. The used analysis conditions and the obtained GC spectra of products

The analysis condition of gas chromatography with a FID detector is presented as follows: The used capillary column is HP-5MS column (30m×0.25mm×0.25μm); Detector temperature: 250 °C; Injection temperature: 220 °C; Carrier gas: N<sub>2</sub> with the 1.0 mL/min of rate.

In addition, the qualitative analyses of products were conducted with the Agilent 6890/5973 GC-MS equipped with the HP-5MS capillary column.

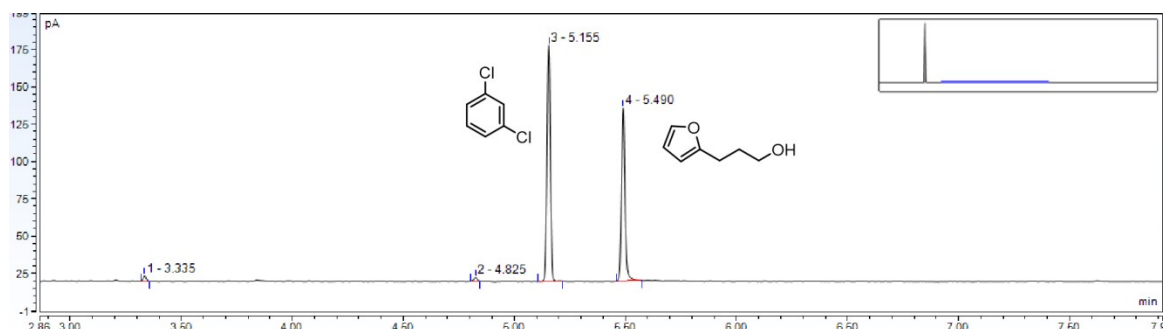

**Figure S8.** The GC spectrum for the reaction of furan-2-acrolein using the CuCoAlNiFeO<sub>x</sub> solid catalyst

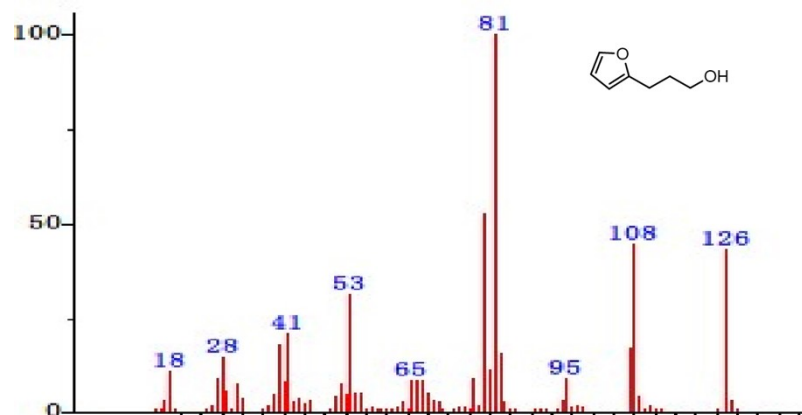

**Figure S9.** The GC-MS data for the reaction of furan-2-acrolein with the CuCoAlNiFeO<sub>x</sub> catalyst

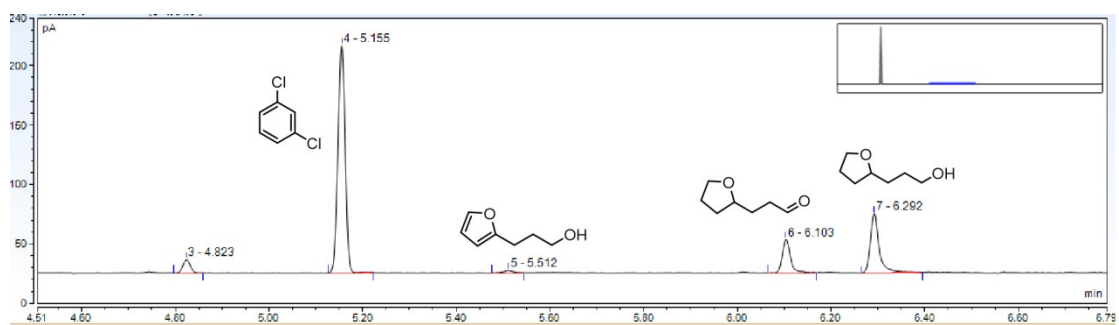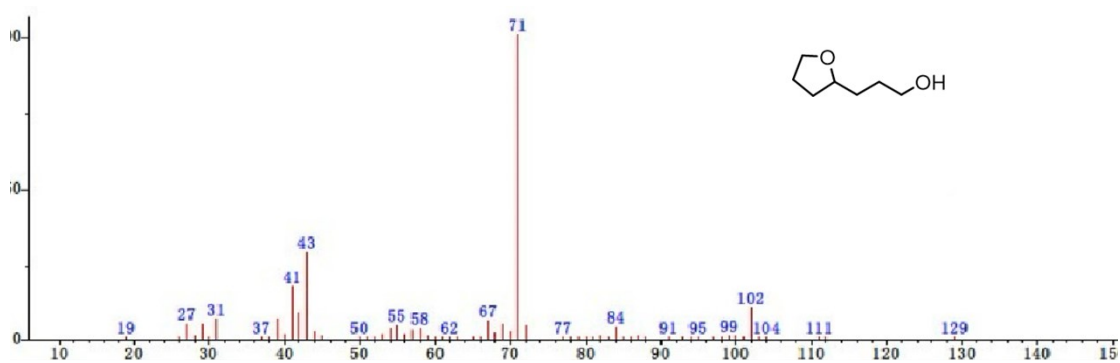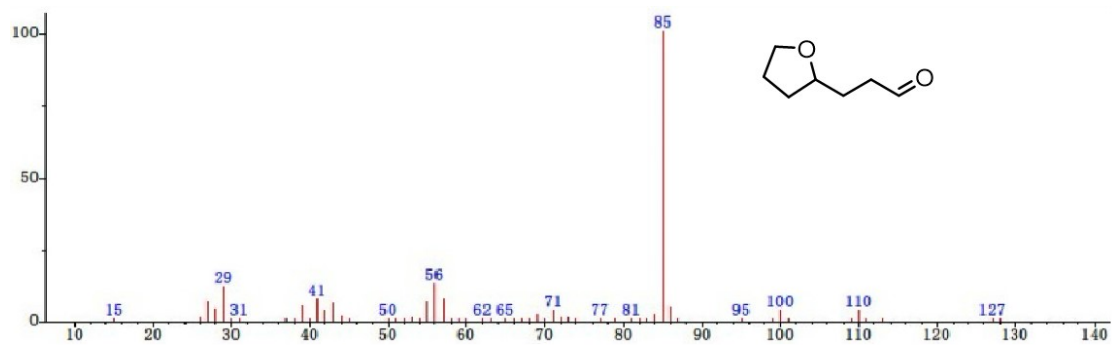

Figure S10. GC spectrum and GC-MS result for the reaction of furan-2-acrolein with CuCoAlNiFe-250R catalyst
